# Supplementary material for: Stabilized coronavirus spikes are resistant to conformational changes induced by receptor recognition or proteolysis
Source: Springer Nature journal article supplement (doi:10.1038/s41598-018-34171-7), 2018-10-18
Supplement: 41598_2018_34171_MOESM1_ESM.pdf [file 41598_2018_34171_MOESM1_ESM.pdf]

## Supplementary Information

Stabilized coronavirus spikes are resistant to conformational changes induced by receptor recognition or proteolysis

Robert N. Kirchdoerfer<sup>1</sup>, Nianshuang Wang<sup>2,3</sup>, Jesper Pallesen<sup>1</sup>, Daniel Wrapp<sup>2,3</sup>, Hannah L. Turner<sup>1</sup>, Christopher A. Cottrell<sup>1</sup>, Kizzmekia S. Corbett<sup>4</sup>, Barney S. Graham<sup>4</sup>, Jason S. McLellan<sup>2,3</sup>, Andrew B. Ward<sup>1#</sup>

<sup>1</sup>Department of Integrative Structural and Computational Biology, The Scripps Research Institute, La Jolla, CA 92037

<sup>2</sup>Department of Biochemistry and Cellular Biology, Geisel School of Medicine at Dartmouth, Hanover, NH 03755

<sup>3</sup>Current address: Department of Molecular Biosciences, The University of Texas at Austin, Austin, TX, 78712

<sup>4</sup>Vaccine Research Center, National Institute of Allergy and Infectious Diseases, Bethesda, MD 20814

#Corresponding author

ABW: [andrew@scripps.edu](mailto:andrew@scripps.edu)

|                                      | SARS S 2P, one ' up' | SARS S 2P, two ' up' | SARS S 2P, three ' up' | SARS S 2P, all particle | SARS S 2P Trypsin, all<br>' down' | SARS S 2P Trypsin, one ' up' | SARS S 2P Trypsin, two ' up' | SARS S 2P Trypsin, three ' up' | SARS S 2P Trypsin, all particle |
|--------------------------------------|----------------------|----------------------|------------------------|-------------------------|-----------------------------------|------------------------------|------------------------------|--------------------------------|---------------------------------|
| EMDB                                 | 7574                 | 7575                 | 7576                   | 7573                    | 7581                              | 7578                         | 7579                         | 7580                           | 7577                            |
| PDB                                  | 6CRW                 | 6CRX                 | -                      | 6CRV                    | -                                 | 6CS0                         | 6CS1                         | -                              | 6CRZ                            |
| Defocus Range<br>( $\mu\text{m}$ )   | -1.2 –<br>-2.2       | -1.2 –<br>-2.2       | -1.2 –<br>-2.2         | -1.2 –<br>-2.2          | -1.2 –<br>-2.2                    | -1.2 –<br>-2.2               | -1.2 –<br>-2.2               | -1.2 –<br>-2.2                 | -1.2 –<br>-2.2                  |
| Symmetry                             | C1                   | C1                   | C3                     | C3                      | C3                                | C1                           | C1                           | C3                             | C3                              |
| Frames/movie                         | 48                   | 48                   | 48                     | 48                      | 48                                | 48                           | 48                           | 48                             | 48                              |
| Initial particles                    | 104,184              | 104,184              | 104,184                | 104,184                 | 162,177                           | 162,177                      | 162,177                      | 162,177                        | 162,177                         |
| Final particles                      | 58,349               | 38,603               | 3,316                  | 104,184                 | 6,664                             | 139,746                      | 15,314                       | 452                            | 162,177                         |
| Map resolution<br>( $\text{\AA}$ )   | 3.9                  | 3.9                  | 4.5                    | 3.2                     | 5.3                               | 3.8                          | 4.6                          | 10.6                           | 3.3                             |
| B-factor sharp<br>( $\text{\AA}^2$ ) | -94                  | -109                 | -93                    | -123                    | -145                              | -127                         | -139                         | -458                           | -139                            |

**Table 1. Electron microscopy data and refinement statistics.** All image movies were collected at a nominal magnification of 29,000, resulting in an image pixel size of 1.03  $\text{\AA}$  on a Titan Krios operating at 300 keV with a total  $65 \text{ e}^-/\text{\AA}^2$  using 250 ms/frame. Final resolution was determined at a Fourier shell correlation of 0.143 between independently refined half maps.

|                                      |                                                                    |                                                                      |                                                                        |                                                                      |                                                                      |                                                                    |                                                                        |                                                                      |                                                                        |
|--------------------------------------|--------------------------------------------------------------------|----------------------------------------------------------------------|------------------------------------------------------------------------|----------------------------------------------------------------------|----------------------------------------------------------------------|--------------------------------------------------------------------|------------------------------------------------------------------------|----------------------------------------------------------------------|------------------------------------------------------------------------|
|                                      | SARS S 2P + ACE2, SI RBD configuration:<br>' up' , ' up' , ' down' | SARS S 2P + ACE2, SI RBD configuration:<br>' up' , ' down' , ' down' | SARS S 2P + ACE2, SI RBD configuration:<br>' ACE2' , ' down' , ' down' | SARS S 2P + ACE2, SI RBD configuration:<br>' ACE2' , ' down' , ' up' | SARS S 2P + ACE2, SI RBD configuration:<br>' ACE2' , ' up' , ' down' | SARS S 2P + ACE2, SI RBD configuration:<br>' ACE2' , ' up' , ' up' | SARS S 2P + ACE2, SI RBD configuration:<br>' ACE2' , ' ACE2' , ' down' | SARS S 2P + ACE2, SI RBD configuration:<br>' ACE2' , ' ACE2' , ' up' | SARS S 2P + ACE2, SI RBD configuration:<br>' ACE2' , ' ACE2' , ' ACE2' |
| EMDB                                 | 7584                                                               | 7585                                                                 | 7586                                                                   | 7601                                                                 | 7602                                                                 | 7603                                                               | 7604                                                                   | 7605                                                                 | 7606                                                                   |
| PDB                                  | -                                                                  | -                                                                    | -                                                                      | -                                                                    | -                                                                    | -                                                                  | -                                                                      | -                                                                    | -                                                                      |
| Defocus Range<br>( $\mu\text{m}$ )   | -1.2 - -2                                                          | -1.2 - -2                                                            | -1.2 - -2                                                              | -1.2 - -2                                                            | -1.2 - -2                                                            | -1.2 - -2                                                          | -1.2 - -2                                                              | -1.2 - -2                                                            | -1.2 - -2                                                              |
| Symmetry                             | C1                                                                 | C1                                                                   | C1                                                                     | C1                                                                   | C1                                                                   | C1                                                                 | C1                                                                     | C1                                                                   | C3                                                                     |
| Frames/movie                         | 24                                                                 | 24                                                                   | 24                                                                     | 24                                                                   | 24                                                                   | 24                                                                 | 24                                                                     | 24                                                                   | 24                                                                     |
| Initial particles                    | 164,426                                                            | 164,426                                                              | 164,426                                                                | 164,426                                                              | 164,426                                                              | 164,426                                                            | 164,426                                                                | 164,426                                                              | 164,426                                                                |
| Final particles                      | 19,102                                                             | 63,343                                                               | 22,916                                                                 | 6,755                                                                | 23,854                                                               | 938                                                                | 7,584                                                                  | 3,759                                                                | 965                                                                    |
| Map resolution<br>( $\text{\AA}$ )   | 6.6                                                                | 4.4                                                                  | 6.2                                                                    | 7.6                                                                  | 5.5                                                                  | 13.2                                                               | 8.1                                                                    | 8.8                                                                  | 9.3                                                                    |
| B-factor sharp<br>( $\text{\AA}^2$ ) | -144                                                               | -161                                                                 | -155                                                                   | -215                                                                 | -127                                                                 | -725                                                               | -458                                                                   | -466                                                                 | -590                                                                   |

**Table 2. Electron microscopy data and refinement statistics, continued.** All image movies were collected at a nominal magnification of 29,000, resulting in an image pixel size of 1.03  $\text{\AA}$  on a Titan Krios operating at 300 keV with a total 65  $e/\text{\AA}^2$  using 250 ms/frame. Final resolution was determined at a Fourier shell correlation of 0.143 between independently refined half maps.

|                                   | SARS S 2P + ACE2, all ACE2 bound particles | SARS S 2P + ACE2, S1 RBD configuration: 'ACE2', 'up/down', 'down' | SARS S 2P + ACE2, RBD-ACE2 focused refinement |
|-----------------------------------|--------------------------------------------|-------------------------------------------------------------------|-----------------------------------------------|
| EMDB                              | 7582                                       | 7607                                                              | 7608                                          |
| PDB                               | 6CS2                                       | -                                                                 | -                                             |
| Defocus Range ( $\mu\text{m}$ )   | -1.2 - -2                                  | -1.2 - -2                                                         | -1.2 - -2                                     |
| Symmetry                          | C1                                         | C1                                                                | C1                                            |
| Frames/movie                      | 24                                         | 24                                                                | 24                                            |
| Initial particles                 | 164,426                                    | 164,426                                                           | 164,426                                       |
| Final particles                   | 66,771                                     | 46,770                                                            | 52,916                                        |
| Map resolution ( $\text{\AA}$ )   | 4.4                                        | 4.6                                                               | 7.9                                           |
| B-factor sharp ( $\text{\AA}^2$ ) | -125                                       | -134                                                              | -726                                          |

**Table 3. Electron microscopy data and refinement statistics, continued.** All image movies were collected at a nominal magnification of 29,000, resulting in an image pixel size of 1.03  $\text{\AA}$  on a Titan Krios operating at 300 keV with a total 65  $e^-/\text{\AA}^2$  using 250 ms/frame. Final resolution was determined at a Fourier shell correlation of 0.143 between independently refined half maps.

|                                    | SARS S 2P, all particles | SARS S 2P, one S1 RBD ' up' | SARS S 2P, two S1 RBD ' up' | SARS S 2P Trypsin, all particles | SARS S 2P Trypsin, one S1 RBD ' up' | SARS S 2P Trypsin, two S1 RBD ' up' | SARS S 2P + ACE2, all ACE2 bound particles |
|------------------------------------|--------------------------|-----------------------------|-----------------------------|----------------------------------|-------------------------------------|-------------------------------------|--------------------------------------------|
| <b>Refinement</b>                  |                          |                             |                             |                                  |                                     |                                     |                                            |
| PDB                                | 6CRV                     | 6CRW                        | 6CRX                        | 6CRZ                             | 6CS0                                | 6CS1                                | 6CS2                                       |
| EMDB                               | 7573                     | 7574                        | 7575                        | 7577                             | 7578                                | 7579                                | 7582                                       |
| Initial model used (PDB code)      | 5I08, 5X4S               | 6CRV, 2AJF                  | 6CRW                        | 6CRV                             | 6CRW                                | 6CRX                                | 6CRV, 2AJF                                 |
| Model composition                  |                          |                             |                             |                                  |                                     |                                     |                                            |
| Non-hydrogen atoms                 | 21,036                   | 25,994                      | 26,012                      | 21,078                           | 24,909                              | 25,995                              | 27,860                                     |
| Protein residues                   | 20,499                   | 25,015                      | 25,015                      | 20,499                           | 25,024                              | 25,008                              | 26,679                                     |
| Ligands                            | 537                      | 979                         | 997                         | 579                              | 885                                 | 987                                 | 1,181                                      |
| <i>B</i> factors (Å <sup>2</sup> ) |                          |                             |                             |                                  |                                     |                                     |                                            |
| Protein                            | 62                       | 144                         | 143                         | 60                               | 118                                 | 188                                 | 269                                        |
| Ligand                             | 126                      | 221                         | 206                         | 90                               | 164                                 | 242                                 | 237                                        |
| EMRinger                           | 3.13                     | 1.27                        | 1.86                        | 3.40                             | 1.18                                | 0.43                                | 0.88                                       |
| R.m.s. deviations                  |                          |                             |                             |                                  |                                     |                                     |                                            |
| Bond lengths (Å)                   | 0.013                    | 0.008                       | 0.010                       | 0.008                            | 0.007                               | 0.006                               | 0.007                                      |
| Bond angles (°)                    | 1.34                     | 1.23                        | 1.34                        | 1.20                             | 1.26                                | 1.17                                | 1.20                                       |
| Validation                         |                          |                             |                             |                                  |                                     |                                     |                                            |
| MolProbity score                   | 1.50                     | 1.76                        | 1.83                        | 1.43                             | 1.85                                | 1.86                                | 1.87                                       |
| Clashscore                         | 4.4                      | 6.7                         | 7.0                         | 3.1                              | 6.8                                 | 7.3                                 | 7.6                                        |
| Non-Rotamers (%)                   | 0.3                      | 0.1                         | 0.2                         | 0.1                              | 0.0                                 | 0.0                                 | 0.2                                        |
| Ramachandran plot                  |                          |                             |                             |                                  |                                     |                                     |                                            |
| Favored (%)                        | 95.86                    | 94.28                       | 93.17                       | 95.28                            | 92.22                               | 92.82                               | 92.93                                      |
| Allowed (%)                        | 4.14                     | 5.69                        | 6.80                        | 4.72                             | 7.78                                | 7.18                                | 7.01                                       |
| Outliers (%)                       | 0.00                     | 0.03                        | 0.03                        | 0.00                             | 0.00                                | 0.00                                | 0.06                                       |

**Table 4. Coordinate refinement.** Coordinate models were refined in Phenix with atomic-displacement parameter refinement in the final round<sup>1</sup>. R.m.s. deviations, Molprobity scores, clash scores, rotamer assessment and Ramachandran statistics were calculated with Molprobity<sup>2</sup>. EMRinger scores were calculated using EMRinger<sup>3</sup>.

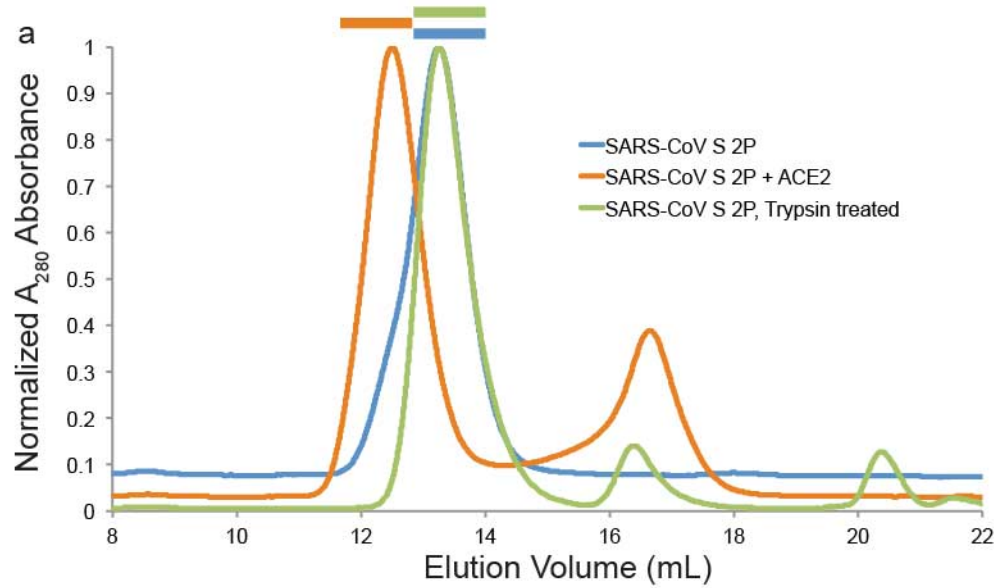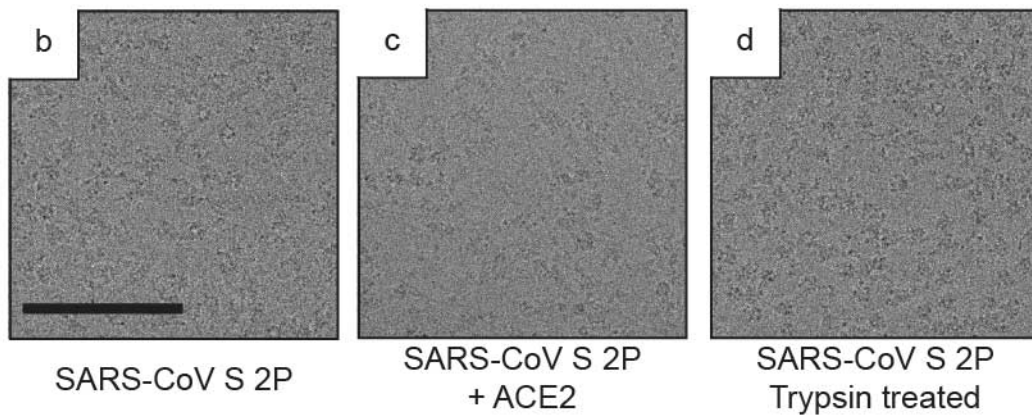

**Supplemental Figure 1: Purification of SARS-CoV S 2P proteins used for study.** a) Size exclusion traces of purified proteins and protein complexes on a Superose6 increase 10/300 column. Fractions taken for electron microscopy sample preparation are indicated by the colored bars above the graph. b-d) Representative electron micrographs for each protein sample used in this study. Scale corresponds to 100 nm.

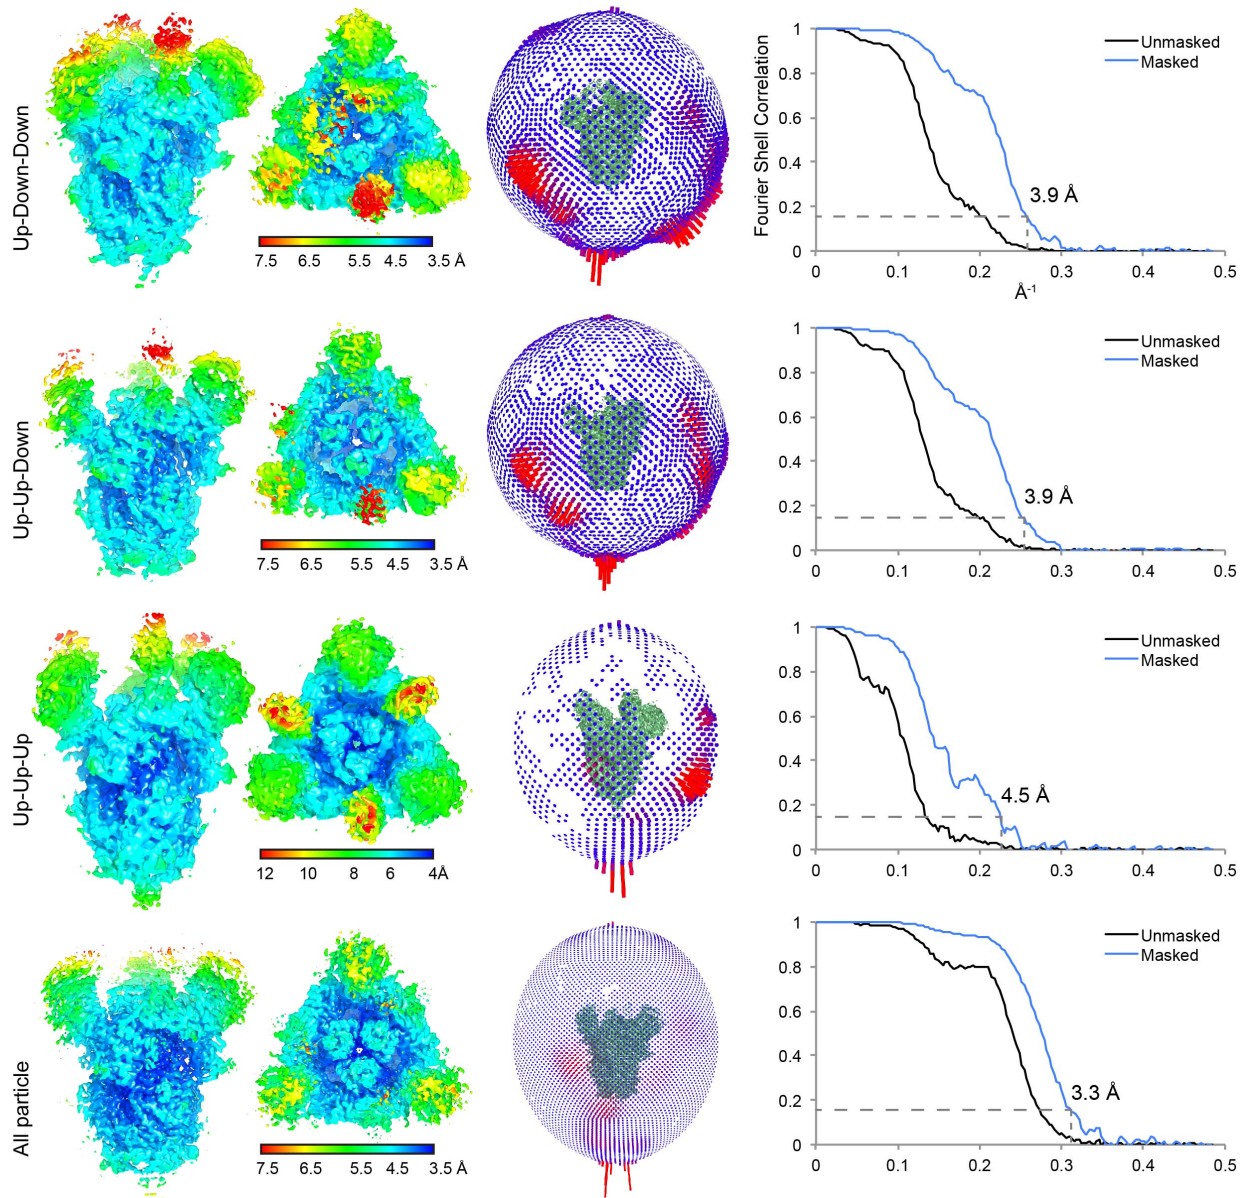

**Supplemental Figure 2: Local Resolution, angular distribution and Fourier shell correlation plots for structures derived from the SARS S 2P dataset.** Local resolution of each reconstruction (side and membrane distal views) was calculated in RELION<sup>4</sup> (left). Angular distribution was taken from the relion\_refine output (center). Fourier shell correlation (FSC) curves were calculated by relion\_postprocess with and without a low-pass filtered mask that had been extended by three pixels with a six pixel Gaussian soft edge (right).

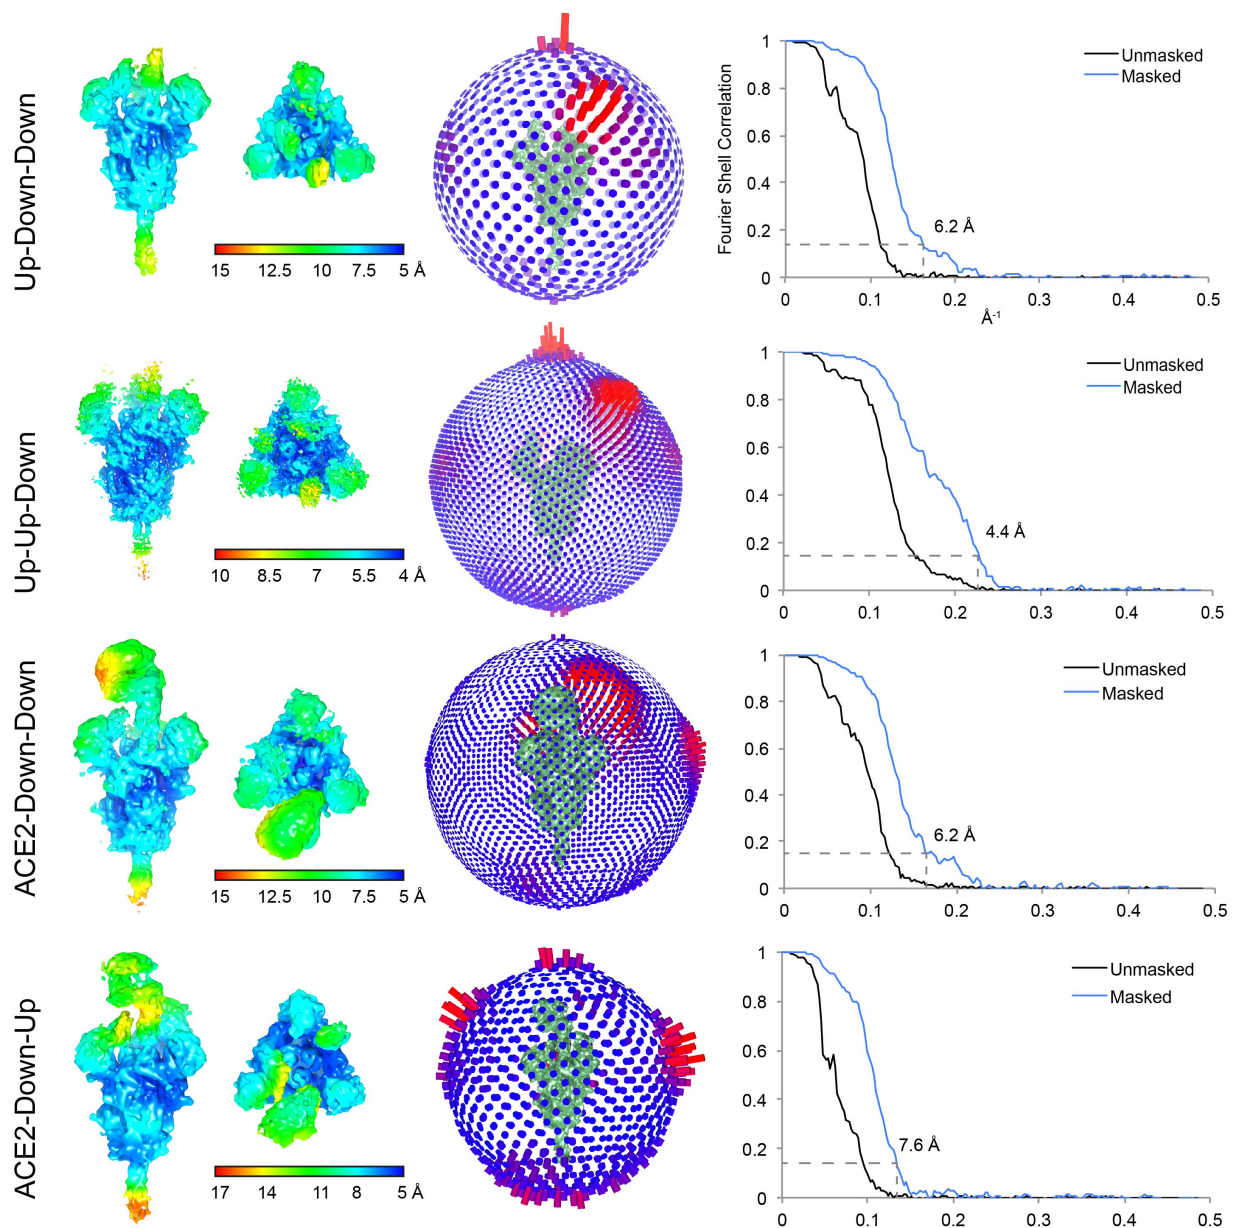

**Supplemental Figure 3: Local Resolution, angular distribution and Fourier shell correlation plots for structures derived from the SARS S 2P – ACE2 dataset (1/3).** Local resolution of each reconstruction (side and membrane distal views) was calculated in RELION<sup>4</sup> (left). Angular distribution was taken from the relion\_refine output (center). Fourier shell correlation (FSC) curves were calculated by relion\_postprocess with and without a low-pass filtered map that had been extended by three pixels with a six pixel Gaussian soft edge (right).



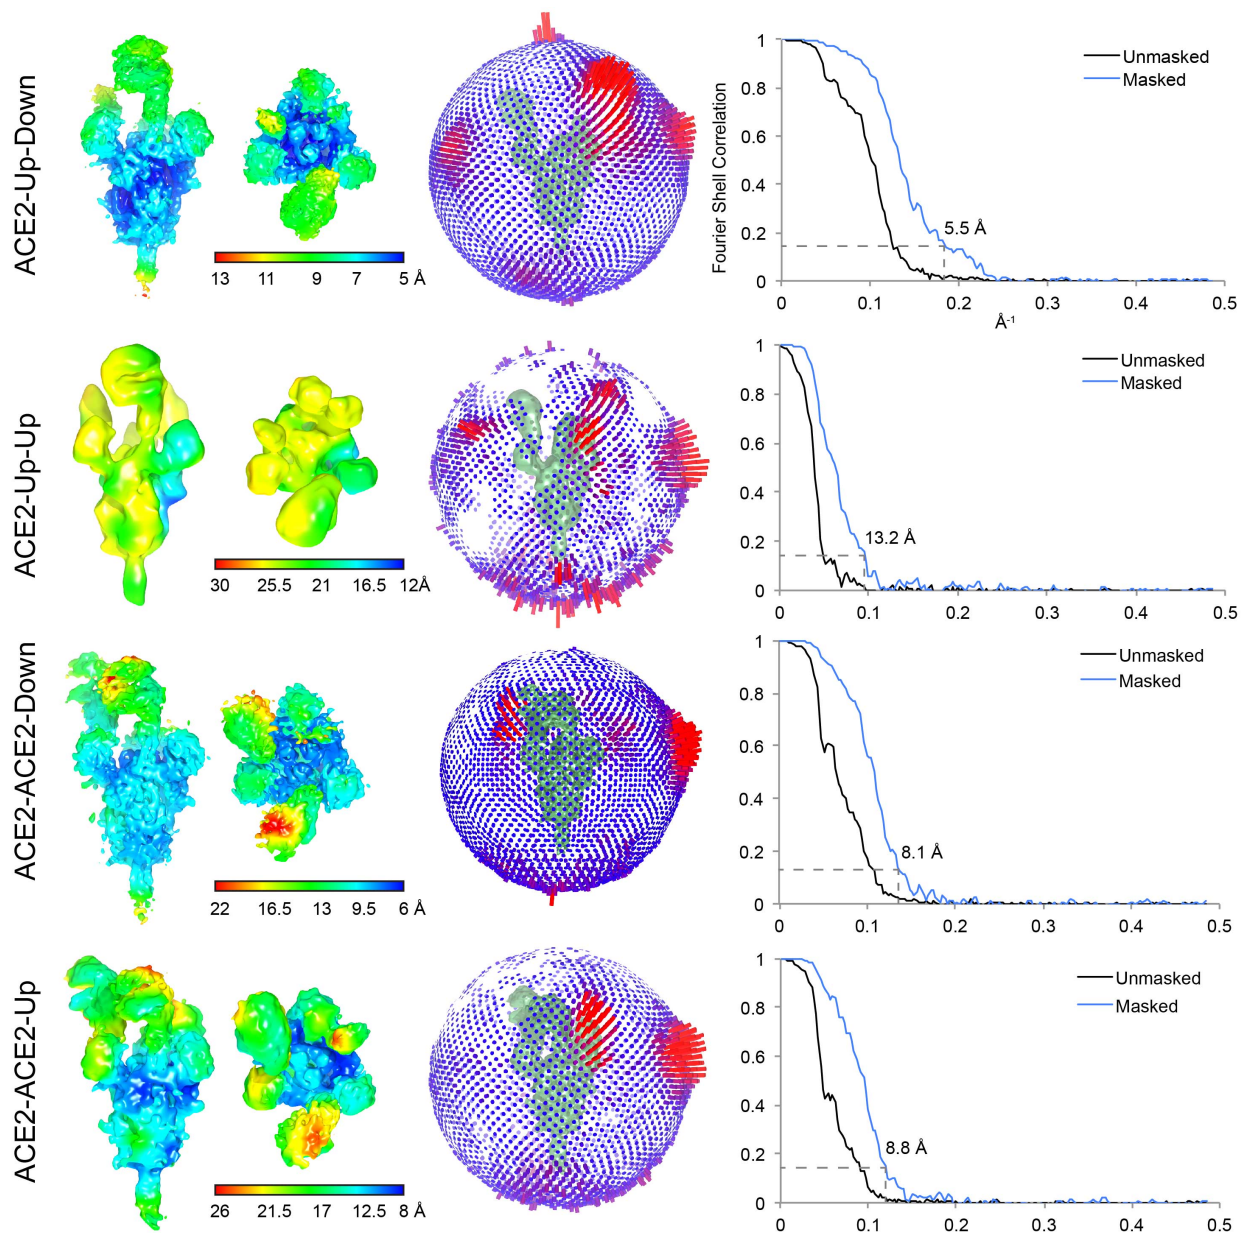

**Supplemental Figure 4: Local Resolution, angular distribution and Fourier shell correlation plots for structures derived from the SARS S 2P – ACE2 dataset (2/3).** Local resolution of each reconstruction (side and membrane distal views) was calculated in RELION<sup>4</sup> (left). Angular distribution was taken from the relion\_refine output (center). Fourier shell correlation (FSC) curves were calculated by relion\_postprocess with and without a low-pass filtered map that had been extended by three pixels with a six pixel Gaussian soft edge (right).

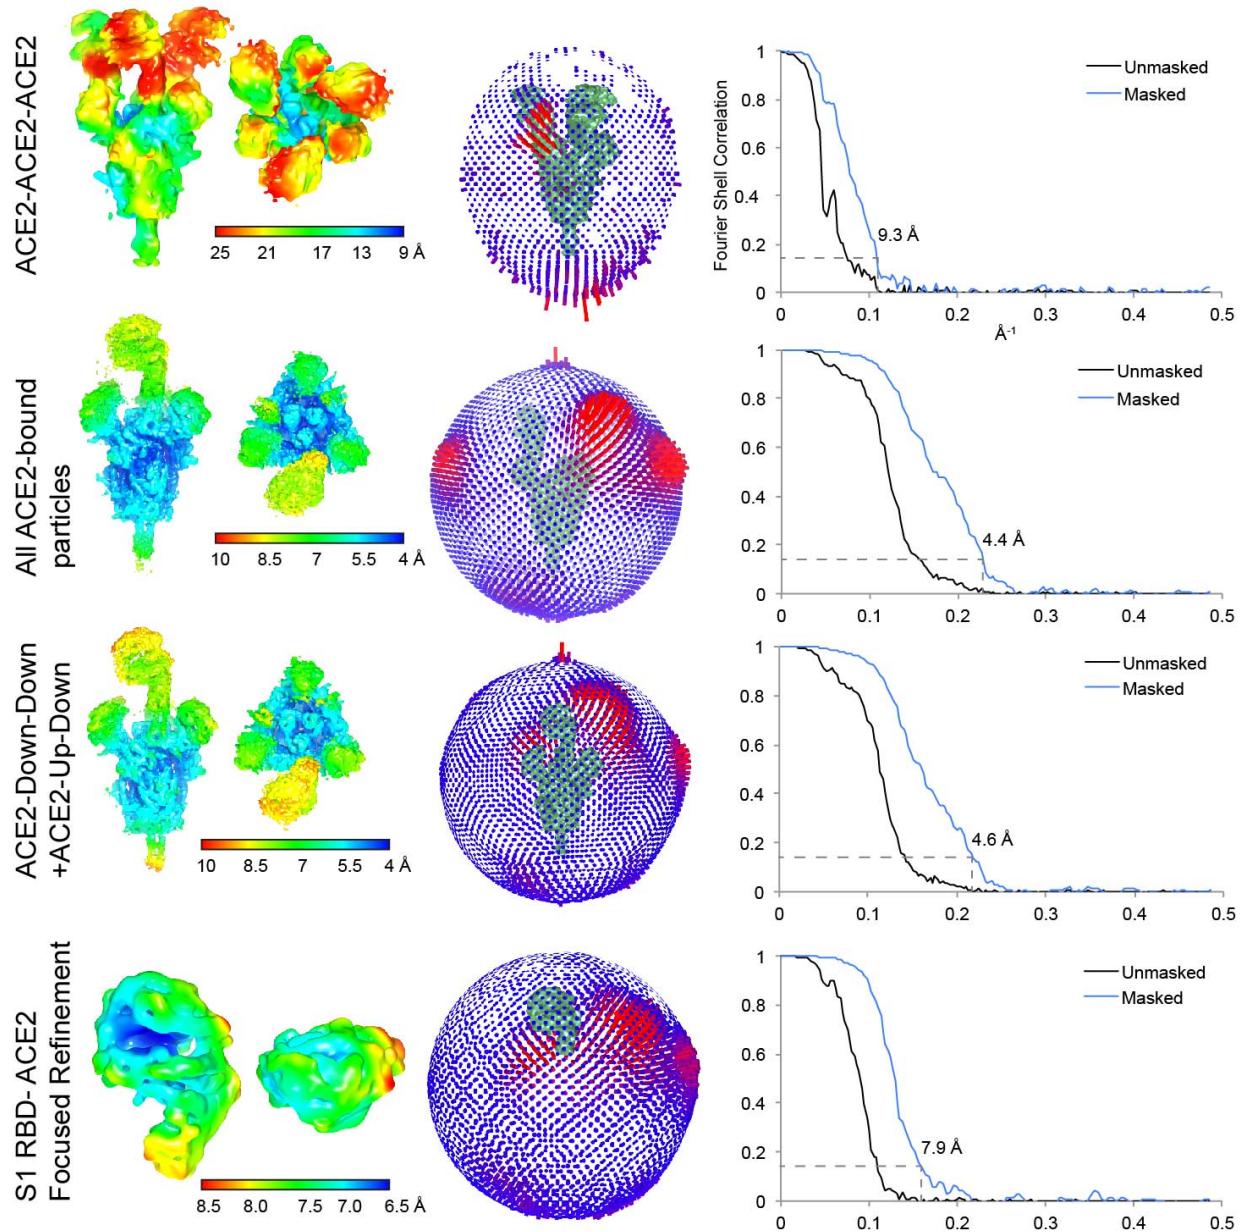

**Supplemental Figure 5: Local Resolution, angular distribution and Fourier shell correlation plots for structures derived from the SARS S 2P – ACE2 dataset (3/3).** Local resolution of each reconstruction (side and membrane distal views) was calculated in RELION<sup>4</sup> (left). Angular distribution was taken from the relion\_refine output (center). Fourier shell correlation (FSC) curves were calculated by relion\_postprocess with and without a low-pass filtered map that had been extended by three pixels with a six pixel Gaussian soft edge (right).

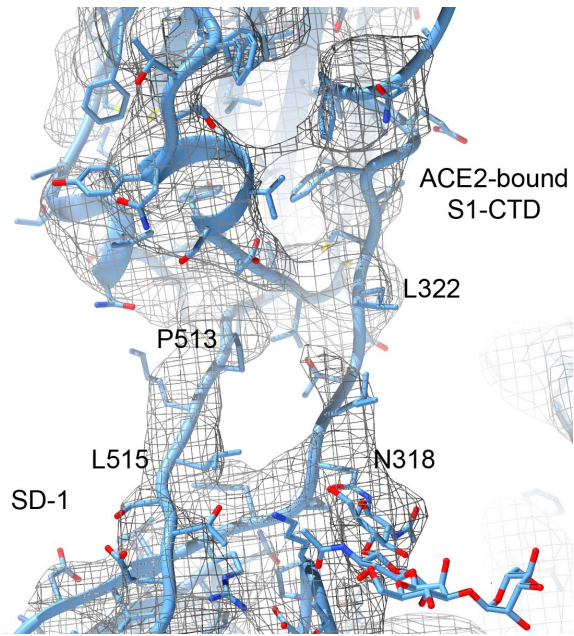

**Supplemental figure S6: EM Density in a hinge region of SARS-CoV S 2P.** There is ordered density between the S1 CTD and the sub-domain 1 (SD-1) in the ACE2-bound S protomer (6CS2.pdb and EMD-7582) to support the positioning of the S1 CTD -ACE2 complex (2AJF.pdb<sup>5</sup>).

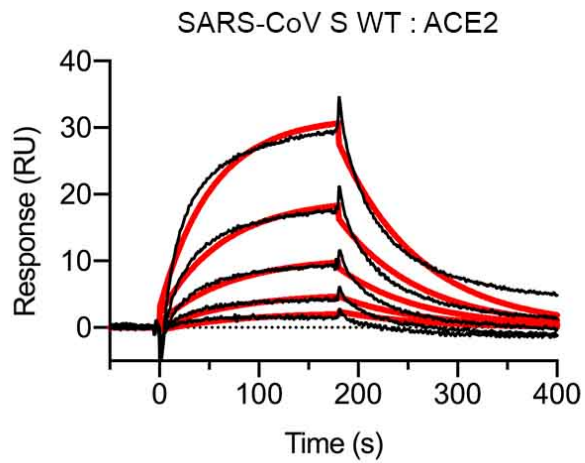

$$K_D = 185.1 \text{ nM}$$

$$k_a = 6.60 \times 10^4 \text{ M}^{-1} \text{ s}^{-1}$$

$$k_d = 1.22 \times 10^{-2} \text{ s}^{-1}$$

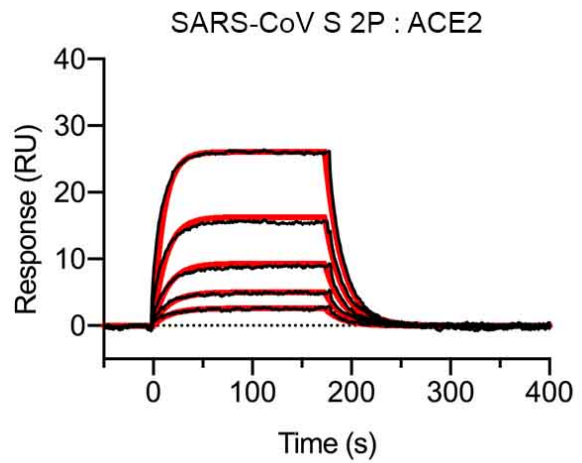

$$K_D = 149.9 \text{ nM}$$

$$k_a = 3.87 \times 10^5 \text{ M}^{-1} \text{ s}^{-1}$$

$$k_d = 5.80 \times 10^{-2} \text{ s}^{-1}$$

**Supplementary Figure S7: ACE2-binding affinities for SARS-CoV S ectodomains.** SARS-CoV spike ectodomains were immobilized on a NTA sensor chip and dilutions of soluble ACE2 were injected to examine the binding affinity and kinetics of each spike ectodomain with ACE2.

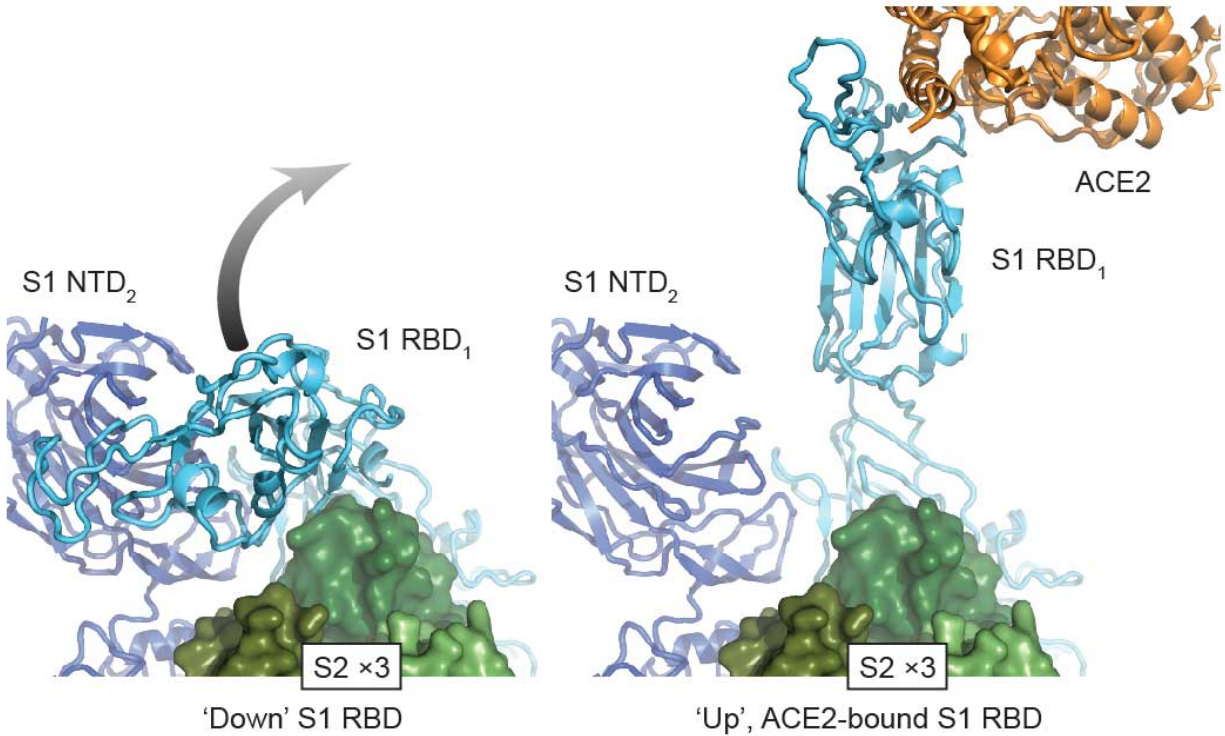

**Supplementary Figure 8: Comparison of 'up' and 'down' S1 RBD conformations.** The S1 RBD in the downward conformation is wedged between an adjacent protomer's S1 NTD and S2 (left). Upon transitioning to the upward conformation (right), the S1 RBD loses its interactions with the adjacent protomer and gains the ability to bind to host protein receptor, ACE2. Adjacent S1 protomers have been omitted for clarity.

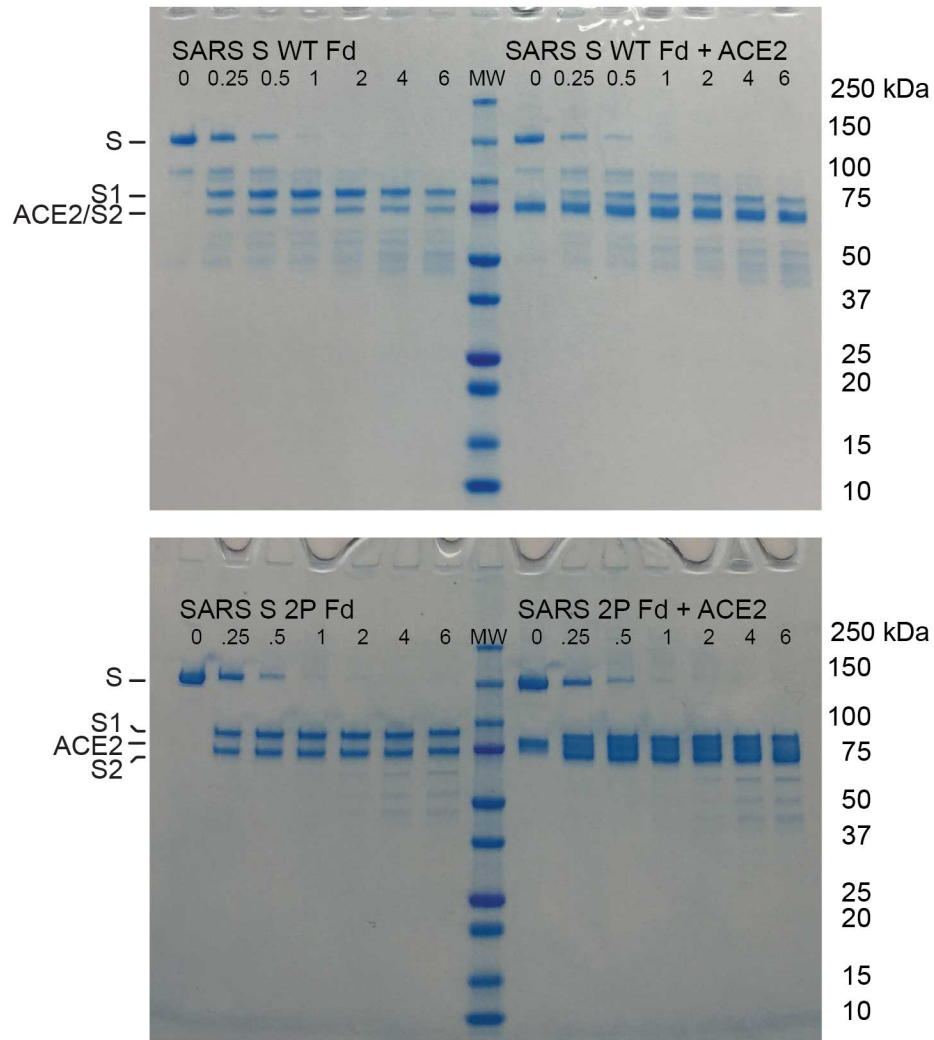

**Supplementary Figure 9: Limited proteolysis of SARS coronavirus spike ectodomains with trypsin.** SARS S WT or 2P was incubated with or without soluble ACE2 and then digested with 0.1% trypsin at 20°C for the time indicated above each lane (hours). Molecular weight labels for the protein standards are included at right.

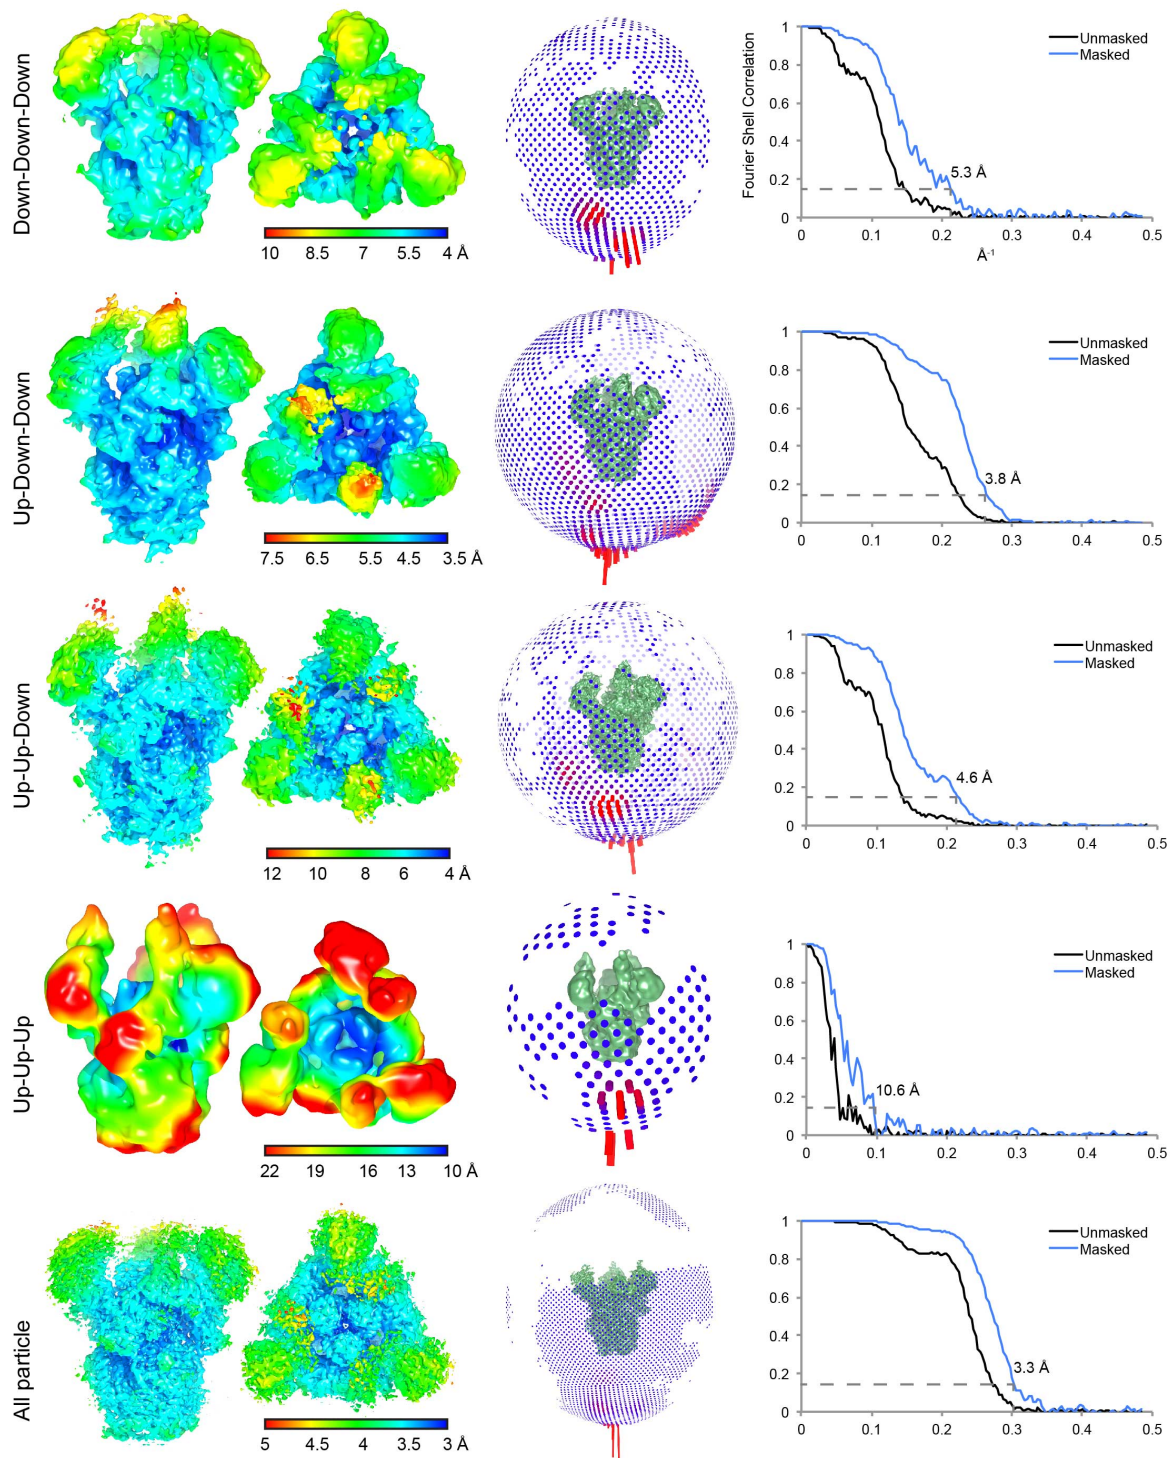

**Supplemental Figure 10: Local Resolution, angular distribution and Fourier shell correlation plots for structures derived from the SARS S 2P – trypsin cleaved dataset.** Local resolution of each reconstruction (side and membrane distal views) was calculated in RELION<sup>4</sup> (left). Angular distribution was taken from the relion\_refine output (center). Fourier

shell correlation (FSC) curves were calculated by `relion_postprocess` with and without a low-pass filtered map that had been extended by three pixels with a six pixel Gaussian soft edge (right).



## References

- 1 Adams, P. D. *et al.* PHENIX: a comprehensive Python-based system for macromolecular structure solution. *Acta crystallographica. Section D, Biological crystallography* **66**, 213-221, doi:10.1107/s0907444909052925 (2010).
- 2 Chen, V. B. *et al.* MolProbity: all-atom structure validation for macromolecular crystallography. *Acta crystallographica. Section D, Biological crystallography* **66**, 12-21, doi:10.1107/s0907444909042073 (2010).
- 3 Barad, B. A. *et al.* EMRinger: side chain-directed model and map validation for 3D cryo-electron microscopy. *Nature methods* **12**, 943-946, doi:10.1038/nmeth.3541 (2015).
- 4 Kimanius, D., Forsberg, B. O., Scheres, S. H. & Lindahl, E. Accelerated cryo-EM structure determination with parallelisation using GPUs in RELION-2. *eLife* **5**, doi:10.7554/eLife.18722 (2016).
- 5 Li, F., Li, W., Farzan, M. & Harrison, S. C. Structure of SARS coronavirus spike receptor-binding domain complexed with receptor. *Science (New York, N.Y.)* **309**, 1864-1868, doi:10.1126/science.1116480 (2005).
